# Supplementary material for: Novel ternary AgIICoIIIF5 fluoride: synthesis, structure and magnetic characteristics
Source: Royal Society of Chemistry journal article supplement (doi:10.1039/d4dt00419a), 2024-01-01
Supplement: d4dt00419a1.pdf [file d4dt00419a1.pdf]

## SUPPLEMENTARY INFORMATION

*Novel Ternary AgIICoIIIF5 Fluoride: Synthesis, Structure and Magnetic Characteristics*

Daniel Jezierski<sup>1\*</sup>, Zoran Mazej<sup>2\*</sup>, Wojciech Grochala<sup>1\*</sup>

### Contents

SI.I Overview of the A<sup>II</sup>B<sup>III</sup>F<sub>5</sub> fluoride family

SI.II Structural data for AgCoF<sub>5</sub>

SI.III Comparison of Rietveld fits for C2/c and C2/m space groups

SI.IV Magnetic data

SI.IV Experimental and theoretical phonon frequencies of AgCoF<sub>5</sub>

SI.V Results of superexchange calculations

SI.VI References

### SI.I Overview of the A<sup>II</sup>B<sup>III</sup>F<sub>5</sub> fluoride family

|       | Compound                       | Magnetic GS* | T <sub>t</sub> [K] | REF  | STRUCTURE                                    |
|-------|--------------------------------|--------------|--------------------|------|----------------------------------------------|
| TM-TM | CrTiF <sub>5</sub>             | Fi           | 26                 | [1]  | C2/c (Cr <sub>2</sub> F <sub>5</sub> - type) |
|       | CrVF <sub>5</sub>              | Fi           | 40                 | [1]  | C2/c (Cr <sub>2</sub> F <sub>5</sub> - type) |
|       | MnCrF <sub>5</sub>             | AF           | 6                  | [2]  | C2/c                                         |
|       | CdMnF <sub>5</sub>             | n.d.         | n.d.               | [3]  | C2/c                                         |
| AE-TM | CaFeF <sub>5</sub>             | AF           | 21                 | [4]  | P2 <sub>1</sub> /c                           |
|       | CaCrF <sub>5</sub>             | P            | ---                | [5]  | C2/c                                         |
|       | CaTiF <sub>5</sub>             | P            | ---                | [6]  | I2/c                                         |
|       | CaMnF <sub>5</sub>             | n.d.         | n.d.               | [3]  | C2/c                                         |
|       | BaFeF <sub>5</sub>             | AF           | 35                 | [7]  | I4                                           |
|       | BaTiF <sub>5</sub>             | n.d.         | n.d.               | [6]  | I4/m                                         |
|       | BaVF <sub>5</sub>              | AF           | 20                 | [8]  | I4                                           |
|       | SrVF <sub>5</sub>              | AF           | 2                  | [4]  | P2 <sub>1</sub> /c                           |
|       | SrCrF <sub>5</sub>             | P            | ---                | [8]  | I4                                           |
|       | SrFeF <sub>5</sub>             | n.d.         | n.d.               | [9]  | P2 <sub>1</sub> /c                           |
| PT-TM | CrAlF <sub>5</sub>             | P            | ---                | [1]  | C2/c (Cr <sub>2</sub> F <sub>5</sub> - type) |
|       | MnAlF <sub>5</sub>             | P            | ---                | [10] | ORTORHOMBIC                                  |
| AE-PT | alpha-CaAlF <sub>5</sub>       | ---          | ---                | [5]  | C2/c                                         |
|       | beta-CaAlF <sub>5</sub>        | ---          | ---                | [11] | P2 <sub>1</sub> /c                           |
|       | SrAlF <sub>5</sub>             | ---          | ---                | [7]  | I4                                           |
|       | PbTF <sub>5</sub> (T = Al, Ga) | ---          | ---                | [12] | n. d.                                        |
|       | BaInF <sub>5</sub>             | ---          | ---                | [13] | n. d.                                        |
| OTHER | Mn(Al,Fe)F <sub>5</sub>        | Fi           | 18-34              | [10] | ORT                                          |

\* Fi – ferrimagnetic, AF – antiferromagnetic, P – paramagnetic; n.d. stands for not determined

## SI.II Structural data for AgCoF<sub>5</sub>

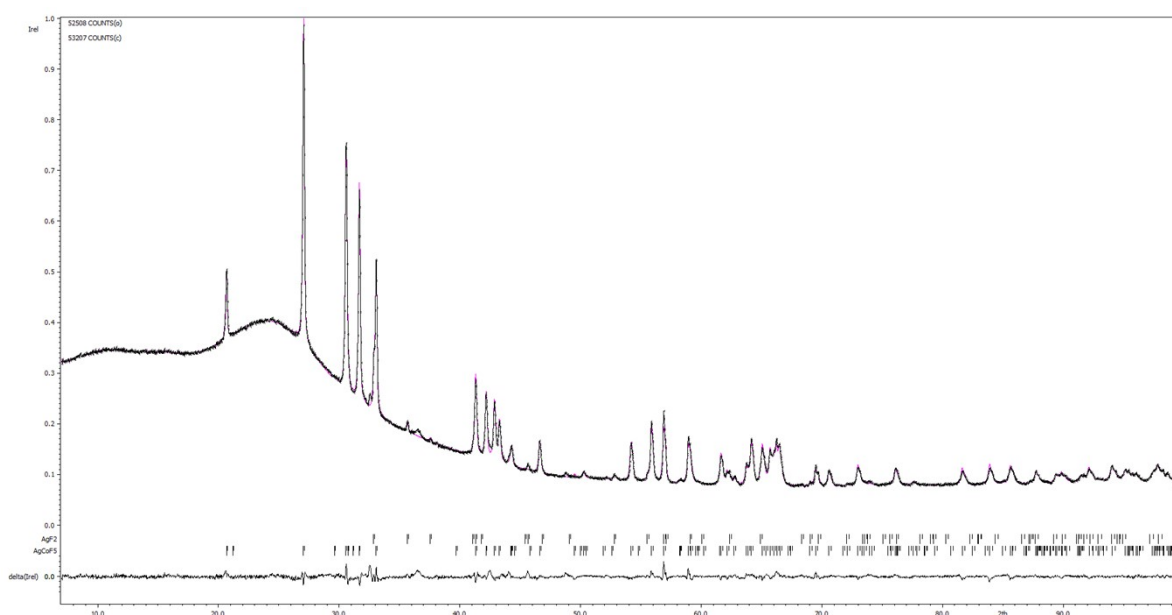

**Figure SI1.** Rietveld refinement of the X-ray pattern for the powder from the first synthetic approach. GoF = 1.15, Rp = 0.98, wRp = 1.36

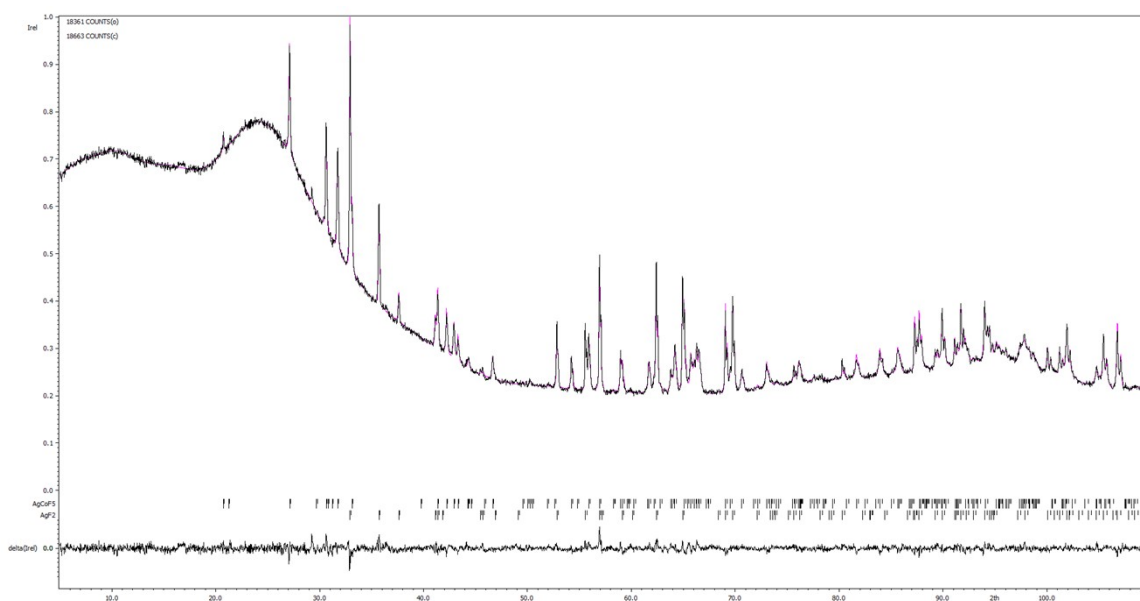

**Figure SI2.** Rietveld refinement of the X-ray pattern for the powder from the second synthetic approach. GoF = 1.66, Rp = 1.12, wRp = 1.68.

**Table SI1.** Unit cell parameters of AgF<sub>2</sub> and AgCoF<sub>5</sub> obtained from Rietveld refinement of two samples 1 (S1) and sample 2 (S2).

| S | Phase              | Parameters |       |       |                     |        | Molar ratio | Uncertainty [%] | Fitting parameters |      |      |
|---|--------------------|------------|-------|-------|---------------------|--------|-------------|-----------------|--------------------|------|------|
|   |                    | a [Å]      | b [Å] | c [Å] | V [Å <sup>3</sup> ] | β [°]  |             |                 | GoF                | Rp   | wRp  |
| 1 | AgF <sub>2</sub>   | 5.546      | 5.831 | 5.091 | 164.636             | 90     | 0.04        | 3               | 1.66               | 1.12 | 1.68 |
|   | AgCoF <sub>5</sub> | 7.274      | 7.628 | 7.529 | 375.552             | 115.98 | 0.96        | 4               |                    |      |      |
| 2 | AgF <sub>2</sub>   | 5.550      | 5.836 | 5.095 | 165.026             | 90     | 0.44        | 8               | 1.15               | 0.98 | 1.36 |
|   | AgCoF <sub>5</sub> | 7.280      | 7.635 | 7.536 | 376.507             | 115.98 | 0.56        | 7               |                    |      |      |

**Table SI2.** Structural details of AgCoF<sub>5</sub> with atomic positions.

| Space group   | <b>C2/c (15)</b>                                      | Temperature | <b>298K</b> | Radiation                          | Co K $\alpha$              |
|---------------|-------------------------------------------------------|-------------|-------------|------------------------------------|----------------------------|
| Unit cell [Å] | $a = 7.274414 (2), b = 7.627744(2), c = 7.529471 (2)$ |             |             | $\alpha = \gamma = 90^\circ$       | $\beta = 115.976(4)^\circ$ |
| Atom          | x                                                     | y           | z           | U <sub>iso</sub> [Å <sup>2</sup> ] | Occupancy                  |
| Co            | 0.000                                                 | 0.000       | 0.000       | 0.003 (14)                         | 1                          |
| Ag            | 0.000                                                 | 0.500       | 0.000       | 0.010 (13)                         | 1                          |
| F1            | 0.000                                                 | -0.038 (5)  | 0.250       | 0.019 (18)                         | 1                          |
| F2            | 0.793 (18)                                            | 0.513 (6)   | 0.624 (18)  | 0.007 (15)                         | 1                          |
| F3            | -0.028 (3)                                            | 0.235 (2)   | 0.448 (3)   | 0.013 (15)                         | 1                          |

It is important to note that the exact determination the positions of the fluorine atoms is a major challenge, even when analyzing single-crystal samples. The structural data of AgCoF<sub>5</sub> were determined using the powder X-ray diffraction technique on polycrystalline samples. This approach was supported by incorporating computational methods at various stages of the structure determination process. It is therefore essential to bear in mind that the positional data of the light atoms may exhibit subtle degrees of approximation.

**Table SI3.** Structural parameters of AgCoF<sub>5</sub> from experimental and various theoretical methods.

| Methods          | a [Å]     | b [Å]    | c [Å]    | V [Å <sup>3</sup> ] | $\beta$ [°] |
|------------------|-----------|----------|----------|---------------------|-------------|
| Rietveld         | 7.274 (2) | 7.628(2) | 7.529(2) | 375.580(19)         | 115.976(4)  |
| DFT+U (U = 5 eV) | 7.187     | 7.643    | 7.535    | 375.305             | 114.948     |
| DFT+U (U = 8 eV) | 7.157     | 7.607    | 7.508    | 370.475             | 115.003     |
| SCAN             | 7.269     | 7.749    | 7.586    | 382.619             | 116.431     |
| HSE06            | 7.201     | 7.661    | 7.527    | 376.855             | 114.819     |

**Table SI4.** Bond lengths and angles in the AgCoF<sub>5</sub> structure: Rietveld and theoretical methods. These theoretical calculations are based on idealized conditions (p,T  $\rightarrow$  0), which leads to some inherent discrepancies compared to experimental data obtained under ambient conditions.

| Methods             | dM-M [Å]                                                        | dM-F [001] [Å]                        | dM-F (001) [Å]                                                 | Bond angle [°]                                                                                          |
|---------------------|-----------------------------------------------------------------|---------------------------------------|----------------------------------------------------------------|---------------------------------------------------------------------------------------------------------|
| Rietveld            | Co-Ag: 3.637(10),<br>3.814(10)<br>Ag-Ag and Co-Co:<br>3.765(10) | Ag-F: 2.562(12)<br><br>Co-F: 1.905(6) | Ag-F: 2.090(16),<br>2.052(16)<br>Co-F: 1.827(16),<br>1.921(13) | Co-F-Co: 162.0(3)° [001];<br>Ag-F-Ag: 107.6(5)° [001]<br>Co-F-Ag: 158.9(12)° [010];<br>130.1(8)° [100]; |
| DFT+U<br>(U = 5 eV) | Co-Ag: 3.593, 3.822<br>Ag-Ag and Co-Co:<br>3.768                | Ag-F: 2.587<br><br>Co-F: 1.916        | Ag-F: 2.071, 2.056<br><br>Co-F: 1.816, 1.943                   | Co-F-Co: 158.9° [001];<br>Ag-F-Ag: 107.9° [001]<br>Co-F-Ag: 158.9° [010];<br>127.9° [100];              |
| DFT+U<br>(U = 8 eV) | Co-Ag: 3.579, 3.803<br>Ag-Ag and Co-Co:<br>3.754                | Ag-F: 2.571<br><br>Co-F: 1.911        | Ag-F: 2.053, 2.043<br><br>Co-F: 1.817, 1.943                   | Co-F-Co: 158.9° [001];<br>Ag-F-Ag: 108.4° [001]<br>Co-F-Ag: 158.6° [010];<br>127.7° [100];              |
| SCAN                | Co-Ag: 3.635, 3.874<br>Ag-Ag and Co-Co:<br>3.793                | Ag-F: 2.563<br><br>Co-F: 1.919        | Ag-F: 2.081, 2.085<br><br>Co-F: 1.826, 1.926                   | Co-F-Co: 162.4° [001];<br>Ag-F-Ag: 109.1° [001]<br>Co-F-Ag: 164.1° [010];<br>130.1° [100];              |
| HSE06               | Co-Ag: 3.600, 3.831<br>Ag-Ag and Co-Co:<br>3.763                | Ag-F: 2.608<br><br>Co-F: 1.910        | Ag-F: 2.070, 2.059<br><br>Co-F: 1.822, 1.928                   | Co-F-Co: 160.2° [001];<br>Ag-F-Ag: 106.9° [001]<br>Co-F-Ag: 159.6° [010];<br>129.1° [100];              |

### SI.III Comparison of Rietveld fits for C2/c and C2/m space groups

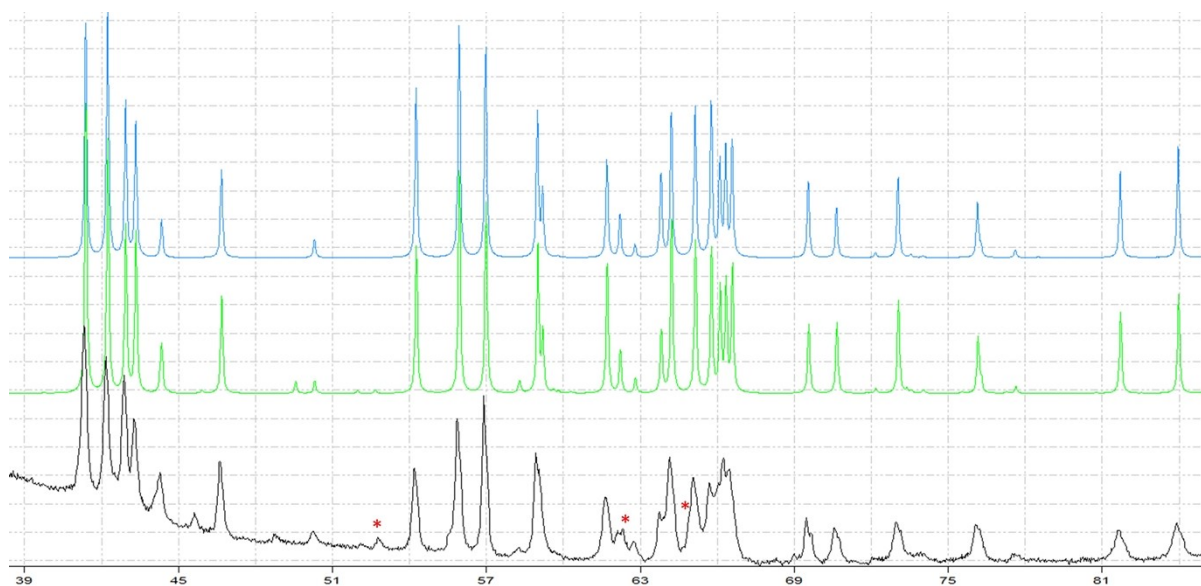

**Figure S13.** Comparison between experimental diffractogram of **S1** (black line), model diffractogram for  $\text{AgCoF}_5$  structure in  $C2/c$  (green line) and  $C2/m$  structure (blue line). Asterisks indicate the positions of potential reflexes originating from  $\text{AgF}_2$  impurities (or may constitute shoulder of the one from  $\text{AgCoF}_5$ ).

**Table S15.** Structure and fitting parameters of  $\text{AgCoF}_5$  from the very first cycle of Rietveld refinement process of  $C2/c$  and  $C2/m$  structures, based on experimental diffractogram from **S1**.

| $\text{AgCoF}_5$<br>group space | Parameters |       |       |                     |             | Fitting parameters |      |      |
|---------------------------------|------------|-------|-------|---------------------|-------------|--------------------|------|------|
|                                 | a [Å]      | b [Å] | c [Å] | V [Å <sup>3</sup> ] | $\beta$ [°] | GoF                | Rp   | wRp  |
| $C2/c$ (Z = 4)                  | 7.276      | 7.629 | 7.531 | 375.803             | 115.981     | 2.56               | 1.63 | 2.59 |
| $C2/m$ (Z = 2)                  | 7.276      | 7.629 | 3.765 | 187.886             | 115.981     | 2.91               | 1.88 | 2.95 |

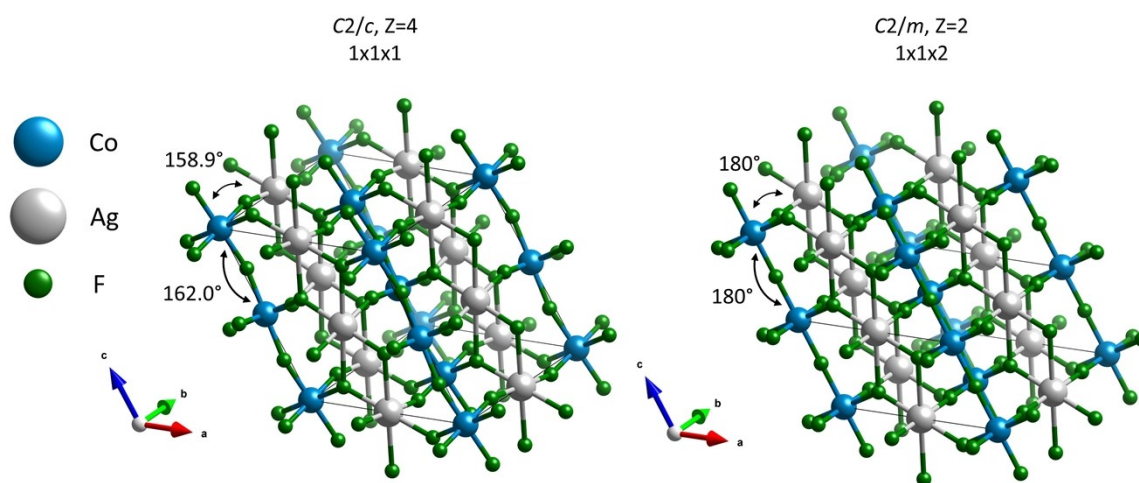

**Figure S14.**  $\text{AgCoF}_5$  in  $C2/c$  (left) and  $C2/m$  (right,  $1 \times 1 \times 2$  supercell) space group. The unit cell is drawn as a solid line.

## SI.IV Experimental and theoretical phonon frequencies of AgCoF<sub>5</sub>

**Table SI6.** Phonon vibration frequencies and their symmetries from DFT+U computations and band positions identified in IR and Raman spectra for AgCoF<sub>5</sub>. Darkened columns indicate bands that are not observable due to symmetry constraints (forbidden by selection rules). Band intensities are categorized as follows: vs - very strong, s - strong, m - medium, w - weak, vw - very weak, sh - shoulder. "Silent" in shaded columns refers to non-active bands. "---" indicates the absence of the corresponding band in the experimental spectra. The indication "n.d." refers to band positions outside the spectroscopists' measurement range. Positions in cm<sup>-1</sup>.

| #  | DFT+U | Symmetry       | IR    | RAMAN  | #  | DFT+U | Symmetry       | IR    | RAMAN  |
|----|-------|----------------|-------|--------|----|-------|----------------|-------|--------|
| 1  | 570   | B <sub>g</sub> |       | 591vs  | 22 | 219   | A <sub>u</sub> |       | silent |
| 2  | 555   | A <sub>u</sub> |       | silent | 23 | 215   | B <sub>u</sub> | 218m  |        |
| 3  | 551   | B <sub>u</sub> | 548sh |        | 24 | 215   | A <sub>u</sub> |       | silent |
| 4  | 534   | A <sub>g</sub> |       | ---    | 25 | 193   | A <sub>u</sub> |       | silent |
| 5  | 519   | B <sub>u</sub> | 510vs |        | 26 | 182   | B <sub>u</sub> | 177m  |        |
| 6  | 471   | B <sub>g</sub> |       | 491m   | 27 | 178   | A <sub>u</sub> |       | silent |
| 7  | 469   | A <sub>u</sub> |       | silent | 28 | 176   | B <sub>g</sub> |       | 173sh  |
| 8  | 452   | B <sub>u</sub> | 452vs |        | 29 | 165   | B <sub>u</sub> | ---   |        |
| 9  | 393   | A <sub>u</sub> |       | silent | 30 | 156   | A <sub>u</sub> |       | silent |
| 10 | 391   | A <sub>g</sub> |       | 393sh  | 31 | 139   | B <sub>u</sub> | 141vw |        |
| 11 | 376   | B <sub>g</sub> |       | 367sh  | 32 | 110   | A <sub>g</sub> |       | 114vs  |
| 12 | 352   | B <sub>u</sub> | 356s  |        | 33 | 102   | B <sub>g</sub> |       | 100sh  |
| 13 | 348   | A <sub>u</sub> |       | silent | 34 | 98    | A <sub>u</sub> |       | silent |
| 14 | 314   | A <sub>u</sub> |       | silent | 35 | 95    | B <sub>u</sub> | 92w   |        |
| 15 | 303   | B <sub>u</sub> | ---   |        | 36 | 79    | A <sub>g</sub> |       | n.d.   |
| 16 | 284   | B <sub>g</sub> |       | 282sh  | 37 | 64    | A <sub>u</sub> |       | silent |
| 17 | 274   | A <sub>g</sub> |       | 273sh  | 38 | 56    | B <sub>u</sub> | n.d.  |        |
| 18 | 266   | A <sub>g</sub> |       | 259m   | 39 | 45    | B <sub>g</sub> |       | n.d.   |
| 19 | 245   | B <sub>u</sub> | 253m  |        | 40 | -1    | B <sub>u</sub> |       |        |
| 20 | 242   | B <sub>g</sub> |       | 241sh  | 41 | -1    | A <sub>u</sub> |       |        |
| 21 | 220   | A <sub>g</sub> |       | 223vw  | 42 | -2    | B <sub>u</sub> |       |        |

**Table SI7** Combination vibrations and overtones observed in the spectra in Figure 5. Positions in cm<sup>-1</sup>.

| IR [cm <sup>-1</sup> ] | RAMAN [cm <sup>-1</sup> ] | ASSIGNEMENT                                                              |
|------------------------|---------------------------|--------------------------------------------------------------------------|
| 110                    |                           | 111 B <sub>u</sub> -> 45 + 56 (IR <sub>Bu</sub> +R <sub>Bg</sub> )       |
| 272                    |                           | 291 (B <sub>u</sub> ) -> 177 + 114 (IR <sub>Bu</sub> + R <sub>Ag</sub> ) |
| 630                    |                           | 624 (B <sub>u</sub> ) -> 510 + 114 (IR <sub>Bu</sub> + R <sub>Ag</sub> ) |
|                        | 802                       | 808 (A <sub>g</sub> ) -> 452 + 356 (IR <sub>Bu</sub> +IR <sub>Bu</sub> ) |
|                        | 1074                      | 1082 (A <sub>g</sub> ) -> 591 + 491 (R <sub>Bg</sub> + R <sub>Bg</sub> ) |
|                        | 1229                      | Overtone (2·B <sub>g</sub> = 2·591 cm <sup>-1</sup> )                    |

## SI.V Magnetic data

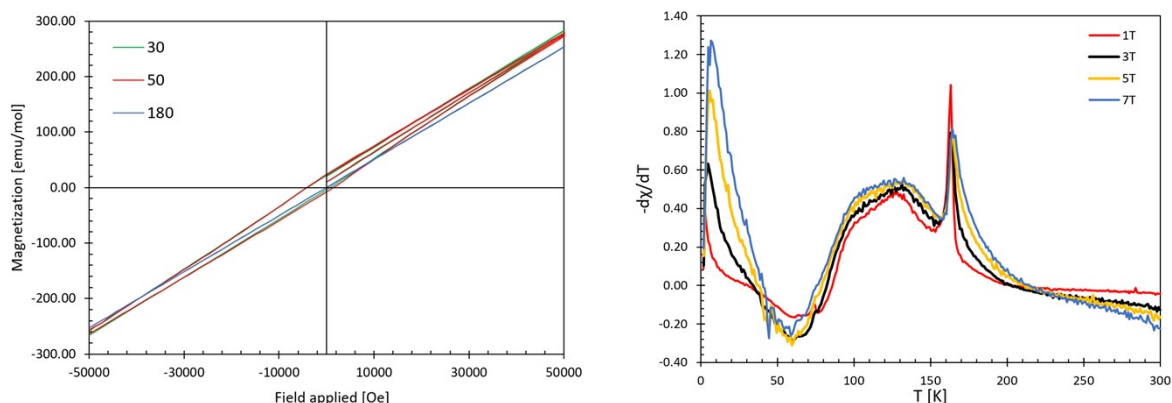

**Figure S15.** Magnetization curves at 30 K, 50 K, 180 K for **S1** as a function of the applied field (left) and first derivatives of the sample magnetization ( $-d\chi/dT$ ) as a function of T dependence on the left, measured at different fields.

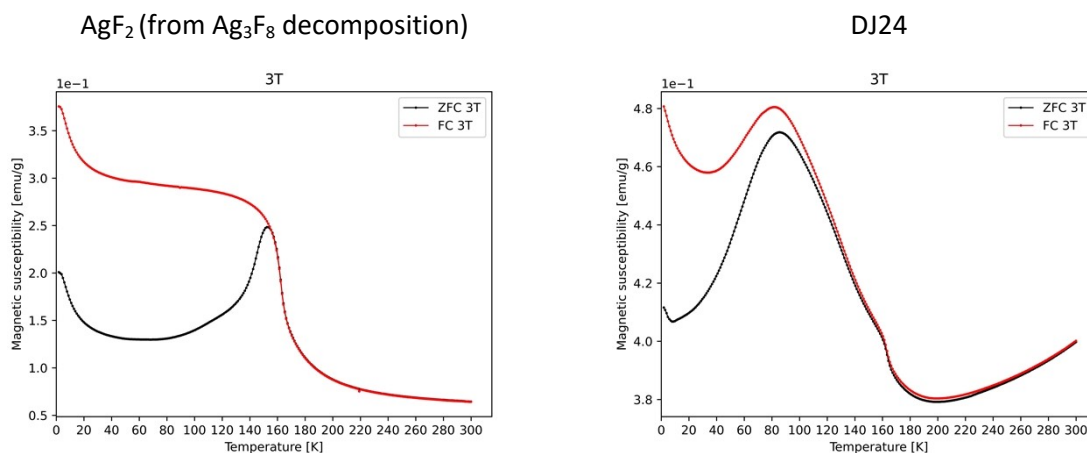

**Figure S16.** Magnetization for  $\text{AgF}_2$  (left) and **S1** (right) – mainly  $\text{AgCoF}_5$  with  $\text{AgF}_2$  traces at 30 kOe vs temperature [K].

A simple subtraction of the contribution of  $\text{AgF}_2$  to the overall magnetic response of the sample does not eliminate the feature at 163 K (see **Figure S16**), which is characteristic of the magnetic transition in silver(II) difluoride, from the susceptibility plot. This leads to considerable complications when analyzing the measurement results and makes it impossible to fit a magnetic model. In addition, there are many other complications, including: 1) different magnetic spins for magnetic ions; 2) low-dimensionality of magnetic interactions.

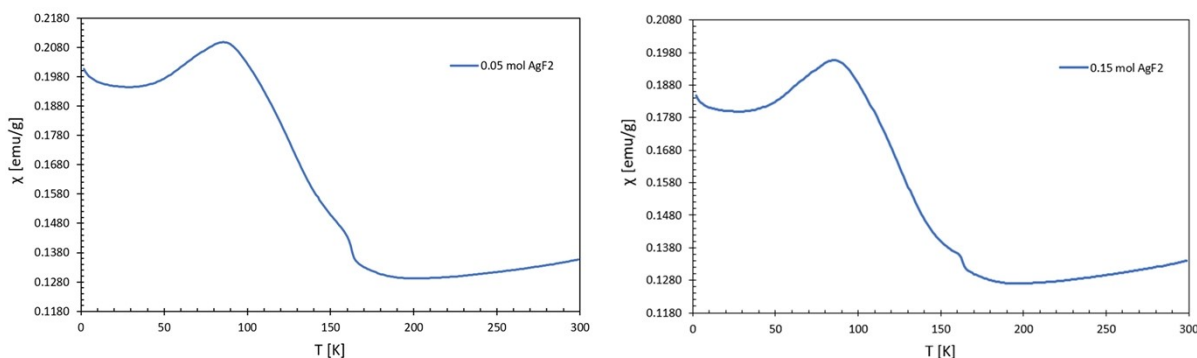

**Figure S17.** Magnetic susceptibility at 10k Oe of sample 1 (**S1**) after subtracting the contribution of

0.05 mol% (left) and 0.15 mol% (right) of AgF<sub>2</sub> to overall magnetic response.

## SI.VI Results of superexchange calculations

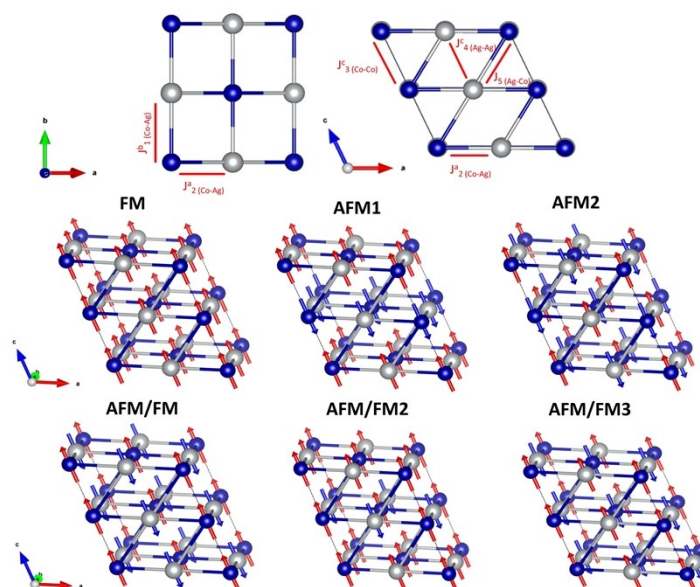

**Figure S18.** Superexchange paths (top) and six possible spin states for AgCoF<sub>5</sub>. The fluorine atoms have been omitted for clarity. Blue and red arrows indicate opposite spin directions. AFM2 is the spin state with the lowest energy.

**Table S18.** Superexchange constants determined with the DFT+U, SCAN and HSE06 methods.

| Method                        | $J_{1(\text{Co-Ag})}^b$ | $J_{2(\text{Co-Ag})}^a$ | $J_{3(\text{Co-Co})}^c$ | $J_{4(\text{Ag-Ag})}^c$ | $J_{5(\text{Ag-Co})}^a$ | Magnetic moments [ $\mu_B$ ] |         |
|-------------------------------|-------------------------|-------------------------|-------------------------|-------------------------|-------------------------|------------------------------|---------|
|                               | [010]<br>[meV]          | [100]<br>[meV]          | [001]<br>[meV]          | [001]<br>[meV]          | [101]<br>[meV]          | Ag                           | Co      |
| DFT+U ( $U_{\text{Ag}}=5$ eV) | -47.74                  | -6.53                   | -8.28                   | -1.11                   | -1.23                   | +/-3.22                      | +/-0.58 |
| DFT+U ( $U_{\text{Ag}}=8$ eV) | -39.25                  | -6.52                   | -8.21                   | -0.37                   | -1.36                   | +/-3.24                      | +/-0.66 |
| SCAN                          | -62.02                  | -4.77                   | -10.28                  | -1.34                   | -1.91                   | +/-3.09                      | +/-0.54 |
| HSE06                         | -39.49                  | -6.74                   | -7.96                   | 0.70                    | -0.52                   | +/-3.47                      | +/-0.73 |

## SI.VII References

- [1] A. Tressaud, J. M. Dance, J. Ravez, J. Portier, P. Hagenmuller, J. B. Goodenough, *Materials Research Bulletin* **1973**, *8*, 1467–1477.
- [2] G. Ferey, R. Pape, *Acta Cryst.* **1978**, 1084–1091.
- [3] U. Müller, R. Hoppe, *Z. Anorg. Allg. Chem.* **1990**, *583*, 205–208.
- [4] J. Graulich, W. Massa, D. Babel, *Z. anorg. allg. Chem.* **2003**, *629*, 365–367.
- [5] K. K. Wu, I. D. Brown, *Materials Research Bulletin* **1973**, *8*, 593–598.
- [6] S. M. Eicher, J. E. Greedan, *Journal of Solid State Chemistry* **1984**, *52*, 12–21.
- [7] R. Von Der Mühl, S. Andersson, J. Galy, *Acta Crystallogr B Struct Crystallogr Cryst Chem* **1971**, *27*, 2345–2353.
- [8] R. Georges, J. Ravez, R. Olazcuaga, P. Hagenmuller, *Journal of Solid State Chemistry* **1974**, *9*, 1–5.
- [9] R. von der Mühl, F. Daut, J. Ravez, *Journal of Solid State Chemistry France* **1973**, *8*, 206–212.
- [10] A. Tressaud, J. M. Parenteau, J. M. Dance, J. Portier, P. Hagenmuller, **1973**, *8*.
- [11] M. Body, G. Silly, C. Legein, J.-Y. Buzaré, F. Calvayrac, P. Blaha, *Journal of Solid State Chemistry* **2005**, *178*, 3655–3661.
- [12] J. Ravez, M. Darriet, R. Von der Mühl, P. Hagenmuller, *Journal of Solid State Chemistry* **1971**, *3*, 234–237.

[13] J. Grannec, J. Ravez, *C. R. Acad. Sc. Série C* **1970**, 270, 2059–2061.
